# Supplementary material
Source: Springer Nature journal article supplement (https://www.springermedizin.de/resource/supplementary/12968_2012_2616_MOESM4_ESM.pdf/9582330)

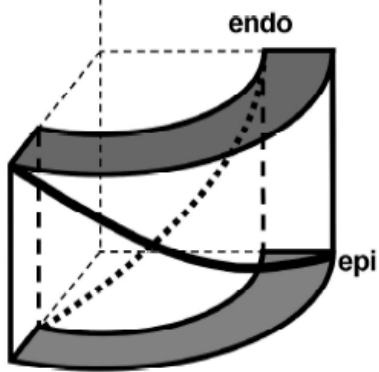

Torsion

endo +  
epi -

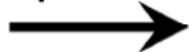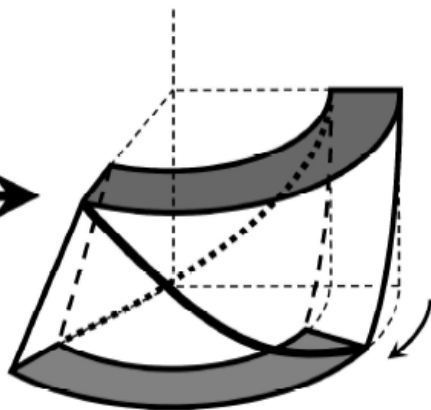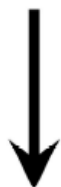

Ejection

endo ---  
epi -

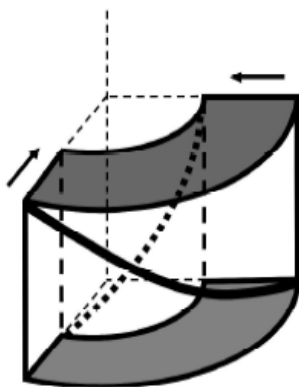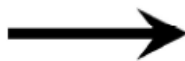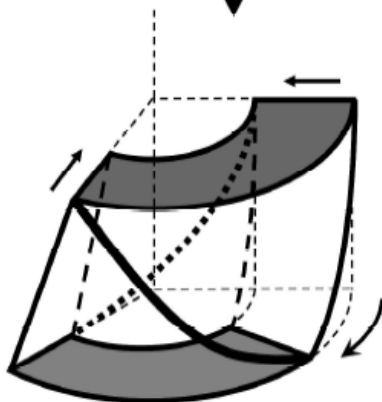

Ejection & Torsion

endo -- epi --

Supplement: MOESM4 [file 9582330]
